# Supplementary material for: Targeted SMN Exon Skipping: A Useful Control to Assess In Vitro and In Vivo Splice-Switching Studies
Source: MDPI journal article supplement (doi:10.3390/biomedicines9050552), 2021-05-14
Supplement: s1 [file s1]

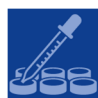

Review

# From Antisense RNA to RNA Modification: Therapeutic Potential of RNA-Based Technologies

Hironori Adachi <sup>1</sup>, Martin Hengesbach <sup>2</sup>, Yi-Tao Yu <sup>1,\*</sup> and Pedro Morais <sup>3,\*</sup>

## Supplementary figure

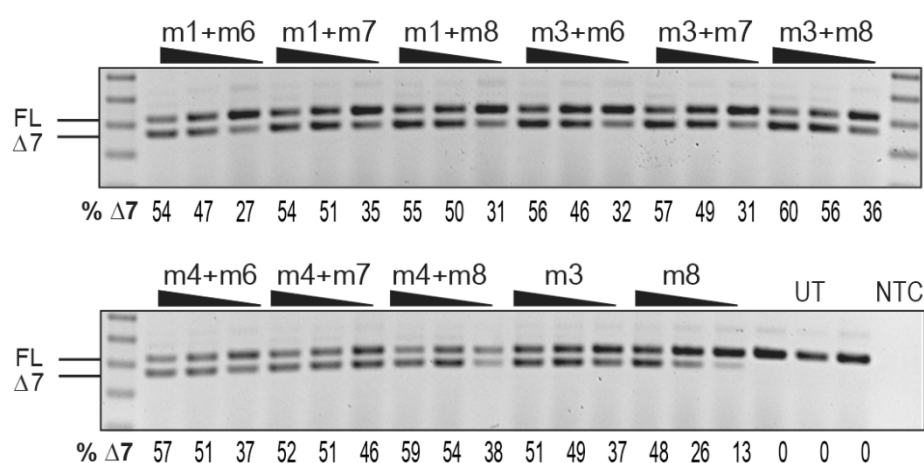

**Figure S1.** RT-PCR analysis of *Smn* transcripts across exons 4 to 8 in *mdx* mouse myoblasts transfected with combinations of 2'OMethyl PS AOs at total concentrations of 200, 100 and 50 nM.
